# Supplementary material for: Bovine Viral Diarrhoea Virus Infection Disrupts Uterine Interferon Stimulated Gene Regulatory Pathways During Pregnancy Recognition in Cows
Source: MDPI journal article supplement (doi:10.3390/v12010001), 2019-12-18

## Supplementary file 2

### Diagnostic plots for ANOVA with linear mixed effect model

#### 1. IFNAR1

##### 1.1. Observed by predicted plot

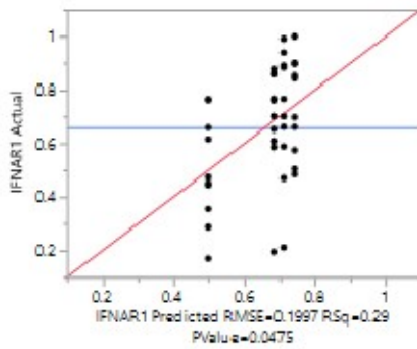

##### 1.2. Residual by predicted plot

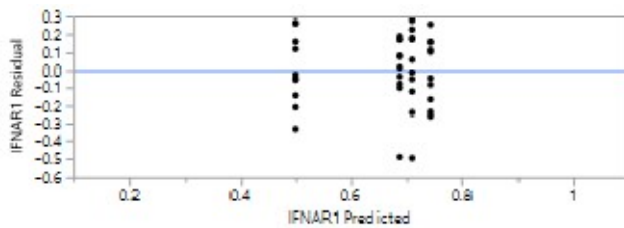

##### 1.3. Treatment plot

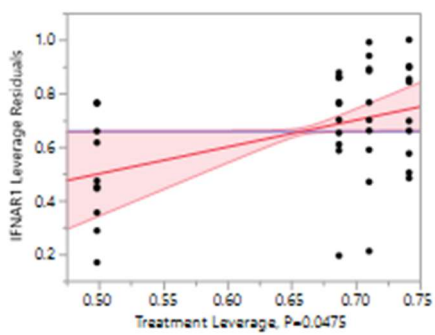

##### 1.4. Histogram

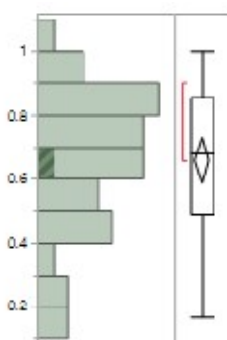

## 2. IFNAR2

### 2.1. Observed by predicted plot

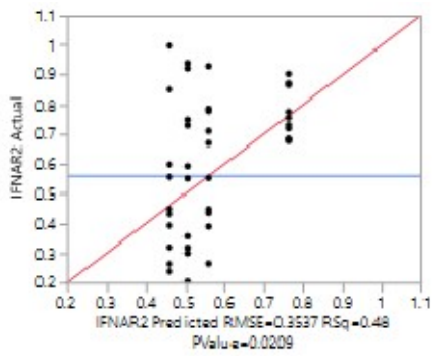

### 2.2. Residual by predicted plot

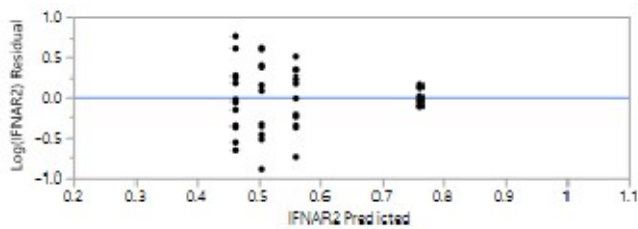

### 2.3. Treatment leverage plot

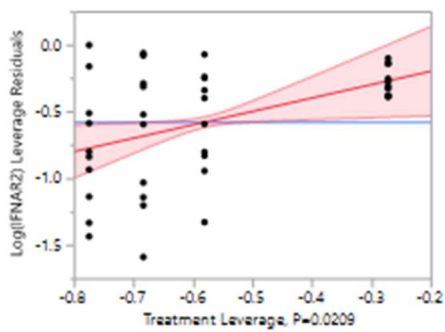

### 2.4. Histogram

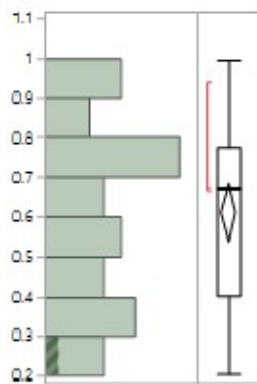

### 3. JAK1

#### 3.1. Observed by predicted plot

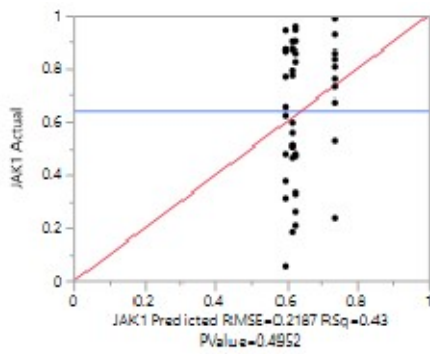

#### 3.2. Residual by predicted plot

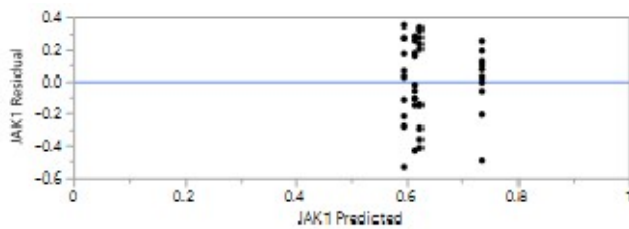

#### 3.3. Treatment leverage plot

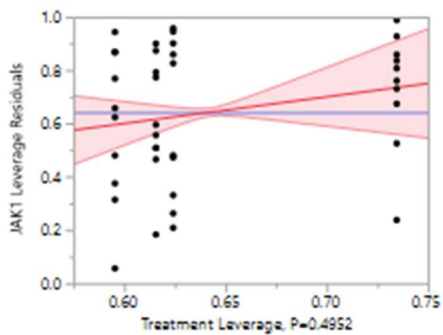

#### 3.4. Histogram

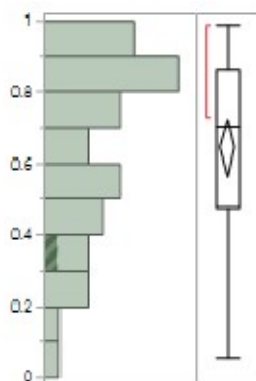

4. TYK2

4.1. Observed by predicted plot

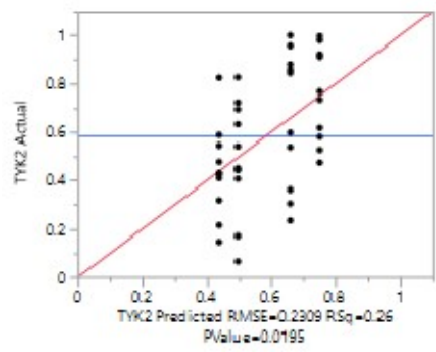

4.2. Residual by predicted plot

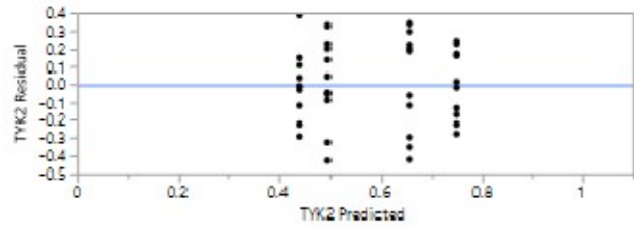

4.3. Treatment leverage plot

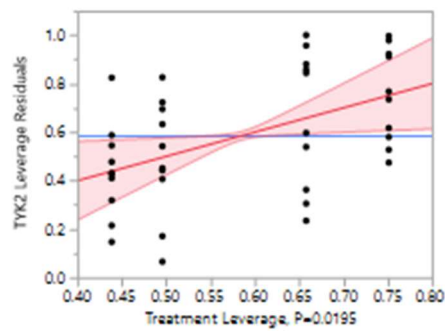

4.4. Histogram

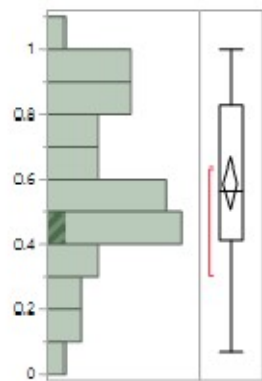

## 5. IRF7

### 5.1. Observed by predicted plot

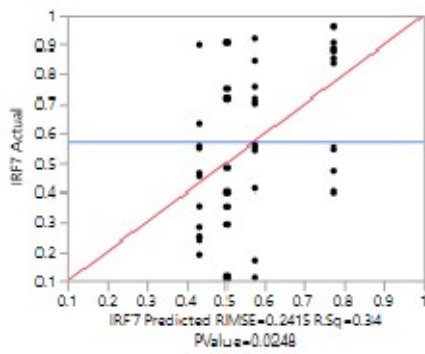

### 5.2. Residual by predicted plot

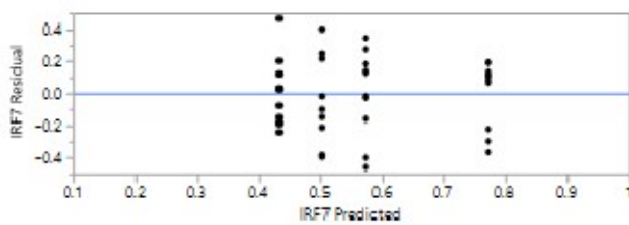

### 5.3. Treatment leverage plot

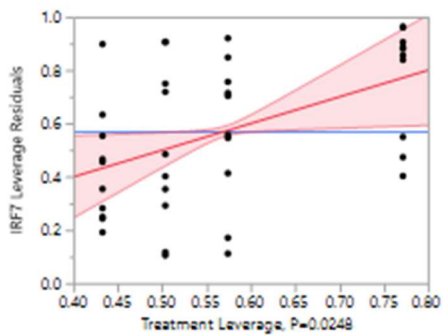

### 5.4. Histogram

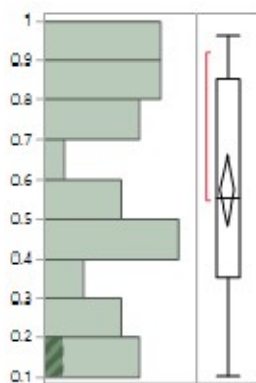

## 6. IRF9

### 6.1. Observed by predicted plot

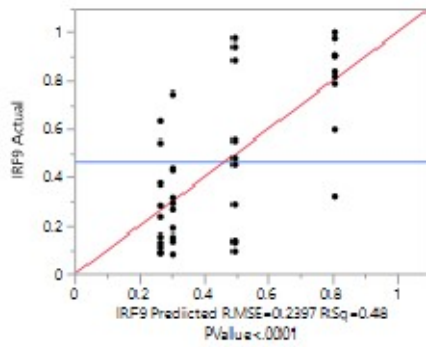

### 6.2. Residual by predicted plot

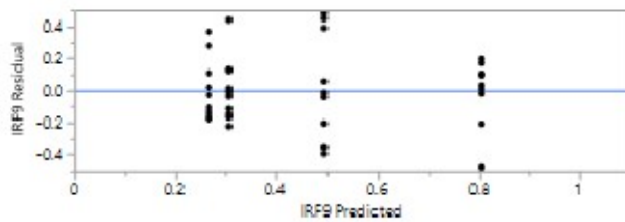

### 6.3. Treatment leverage plot

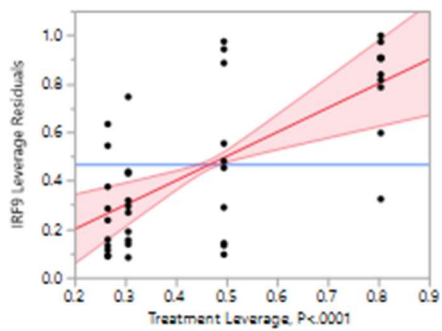

### 6.4. Histogram

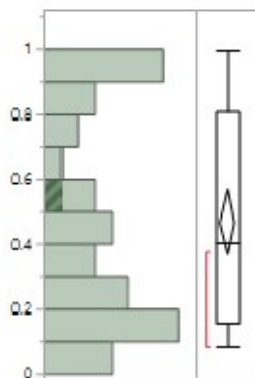

## 7. STAT1

### 7.1. Observed by predicted plot

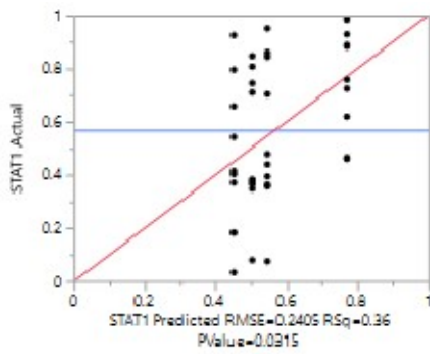

### 7.2. Residual by predicted plot

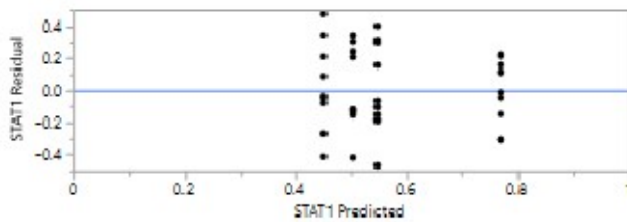

### 7.3. Treatment leverage plot

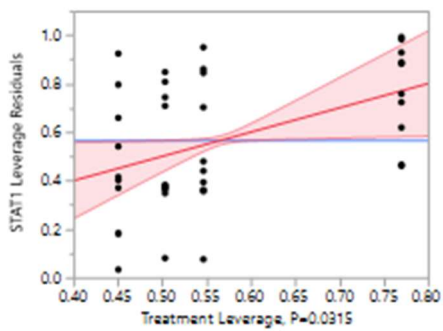

### 7.4. Histogram

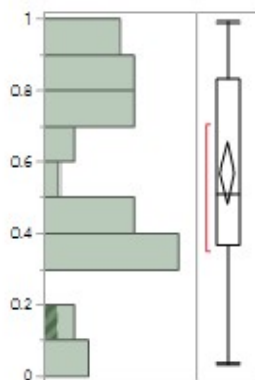

## 8. STAT2

### 8.1. Observed by predicted plot

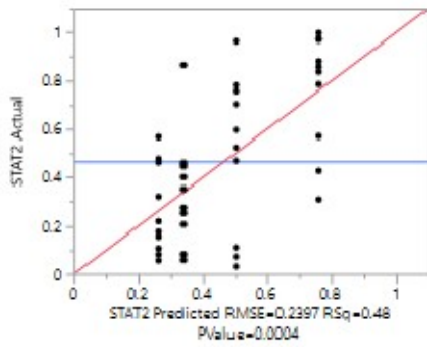

### 8.2. Residual by predicted plot

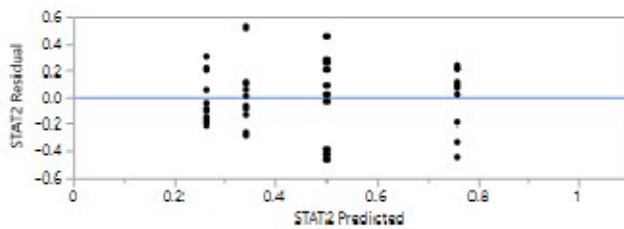

### 8.3. Treatment leverage plot

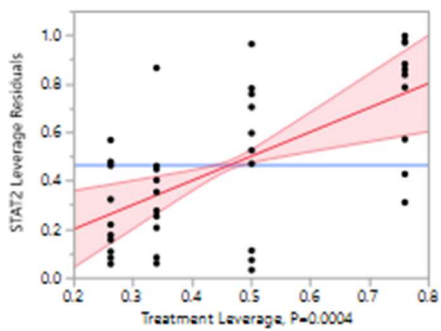

### 8.4. Histogram

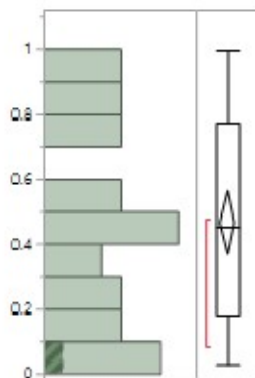



9. IFNG

9.1. Observed by predicted plot

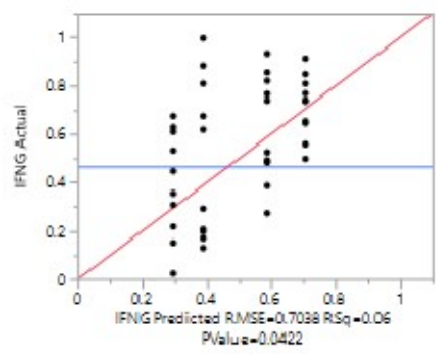

9.2. Residual by predicted plot

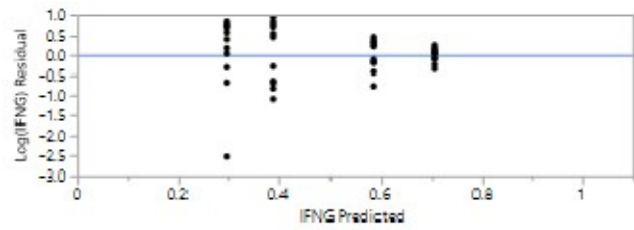

9.3. Treatment leverage plot

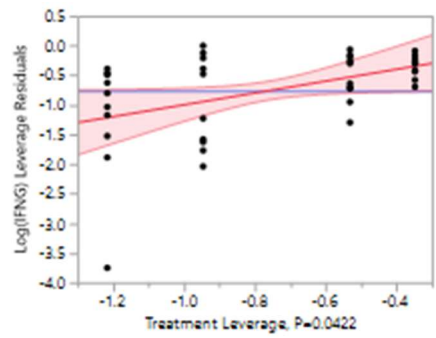

9.4. Histogram

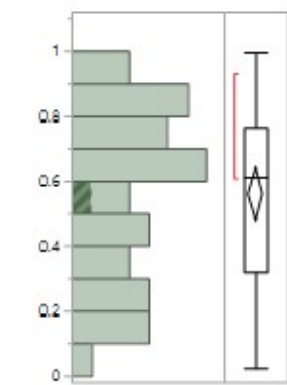

## 10. PIAS2

### 10.1. Observed by predicted plot

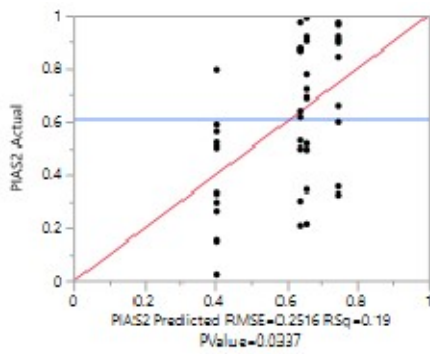

### 10.2. Residual by predicted plot

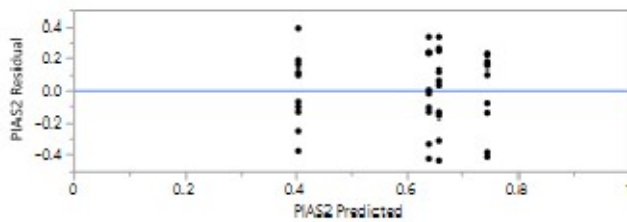

### 10.3. Treatment leverage plot

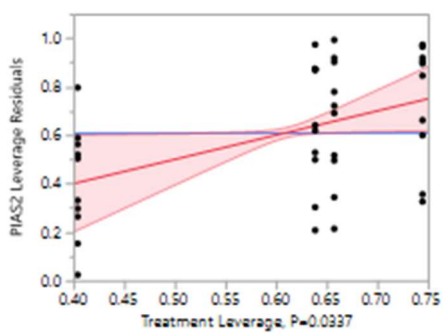

### 10.4. Histogram

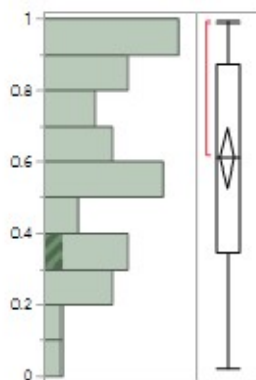

## 11. STAT2 Protein

### 11.1. Observed by predicted plot

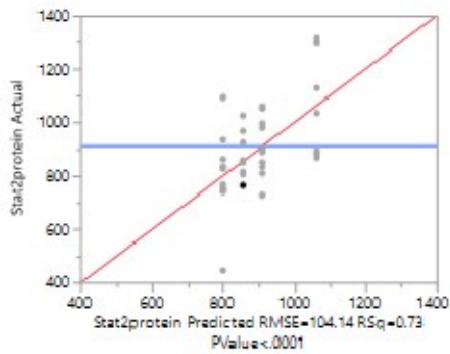

### 11.2. Residual by predicted plot

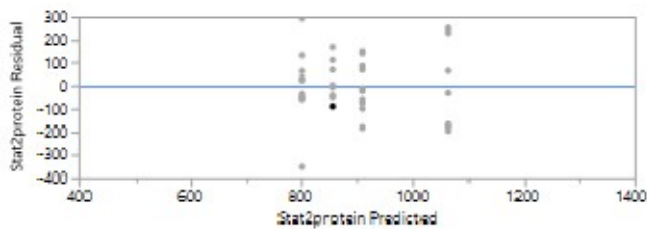

### 11.3. Treatment leverage plot

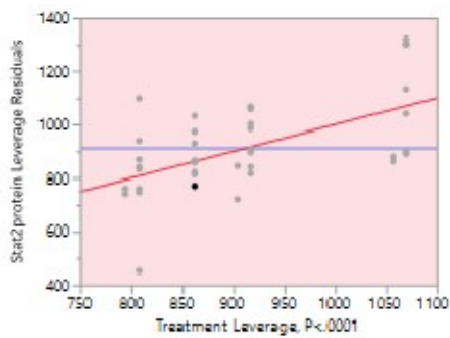

### 11.4. Histogram

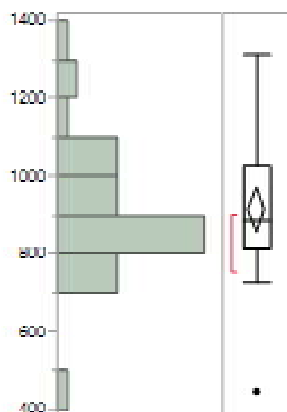

Supplement: s1 [file s1]
