# Supplementary material for: Bovine Viral Diarrhoea Virus Infection Disrupts Uterine Interferon Stimulated Gene Regulatory Pathways During Pregnancy Recognition in Cows
Source: MDPI journal article supplement (doi:10.3390/v12010001), 2019-12-18
Supplement: s1 [file s1]

### Supplementary file 3

#### SPSS output of Variance components via linear mixed effect model

| Genes         | Estimate | Std error | Wald Z | P values |
|---------------|----------|-----------|--------|----------|
| <i>IFNAR1</i> |          |           |        |          |
| Residual      | 0.0396   | 0.0108    | 3.6740 | 0.0000   |
| Cow variance  | 0.0311   | 0.0067    | 0.4630 | 0.6430   |
| <i>IFNAR2</i> |          |           |        |          |
| Residual      | 0.0236   | 0.0064    | 3.674  | 0.0000   |
| Cow variance  | 0.0076   | 0.0065    | 1.1610 | 0.2460   |
| <i>JAK1</i>   |          |           |        |          |
| Residual      | 0.0478   | 0.0130    | 3.6740 | 0.0000   |
| Cow variance  | 0.1942   | 0.0151    | 1.2820 | 0.0000   |
| <i>TYK2</i>   |          |           |        |          |
| Residual      | 0.0533   | 0.01450   | 3.6740 | 0.0000   |
| Cow variance  | 0.0006   | 0.0074    | 0.0790 | 0.9370   |
| <i>IRF7</i>   |          |           |        |          |
| Residual      | 0.0583   | 0.0158    | 3.6740 | 0.0000   |
| Cow variance  | 0.0059   | 0.0104    | 0.5690 | 0.5690   |
| <i>IRF9</i>   |          |           |        |          |
| Residual      | 0.0574   | 0.0156    | 3.6740 | 0.0000   |
| Cow variance  | 0.0009   | 0.0081    | 0.108  | 0.914    |
| <i>STAT1</i>  |          |           |        |          |
| Residual      | 0.5784   | 0.1574    | 3.6740 | 0.0000   |
| Cow variance  | 0.0079   | 0.0112    | 0.7060 | 0.4800   |
| <i>STAT2</i>  |          |           |        |          |
| Residual      | 0.5744   | 0.0156    | 3.6740 | 0.0000   |
| Cow variance  | 0.0056   | 0.0102    | 0.556  | 0.578    |
| <i>IFNG</i>   |          |           |        |          |
| Residual      | 0.0863   | 0.0203    | 4.230  | 0.0000   |
| Cow variance  | N/A      | N/A       | N/A    | N/A      |
| <i>PIAS2</i>  |          |           |        |          |
| Residual      | 0.0732   | 0.0199    | 3.674  | 0.0000   |
| Cow variance  | 0.0067   | 0.0128    | 0.5280 | 0.597    |
| STAT2 Protein |          |           |        |          |
| Residual      | 10844.27 | 3071.08   | 3.5310 | 0.0000   |
| Cow variance  | 10318.69 | 6310.99   | 1.635  | 0.102    |
