# Supplementary material for: Bovine Viral Diarrhoea Virus Infection Disrupts Uterine Interferon Stimulated Gene Regulatory Pathways During Pregnancy Recognition in Cows
Source: MDPI journal article supplement (doi:10.3390/v12010001), 2019-12-18
Supplement: s1 [file s1]

# Supplementary file 4

## Test of homogeneity of variance

| Gene Name     | Levene' statistic* | P values |
|---------------|--------------------|----------|
| <i>IFNAR1</i> | 0.229              | 0.876    |
| <i>IFNAR2</i> | 3.596              | 0.023    |
| <i>STAT1</i>  | 0.615              | 0.610    |
| <i>STAT2</i>  | 1.256              | 0.304    |
| <i>IRF7</i>   | 0.875              | 0.463    |
| <i>IRF9</i>   | 2.161              | 0.110    |
| <i>JAK1</i>   | 1.767              | 0.171    |
| <i>TYK2</i>   | 1.677              | 0.189    |
| <i>PIAS2</i>  | 0.059              | 0.981    |
| <i>IFNG</i>   | 7.290              | 0.001    |
|               |                    |          |
| STAT2 Protein | 1.809              | 0.244    |

\* Levene's statistic based on mean
